# Supplementary material
Source: MDPI journal article supplement (https://www.mdpi.com/1999-4907/12/1/22)
Supplement: s1 [file s1]

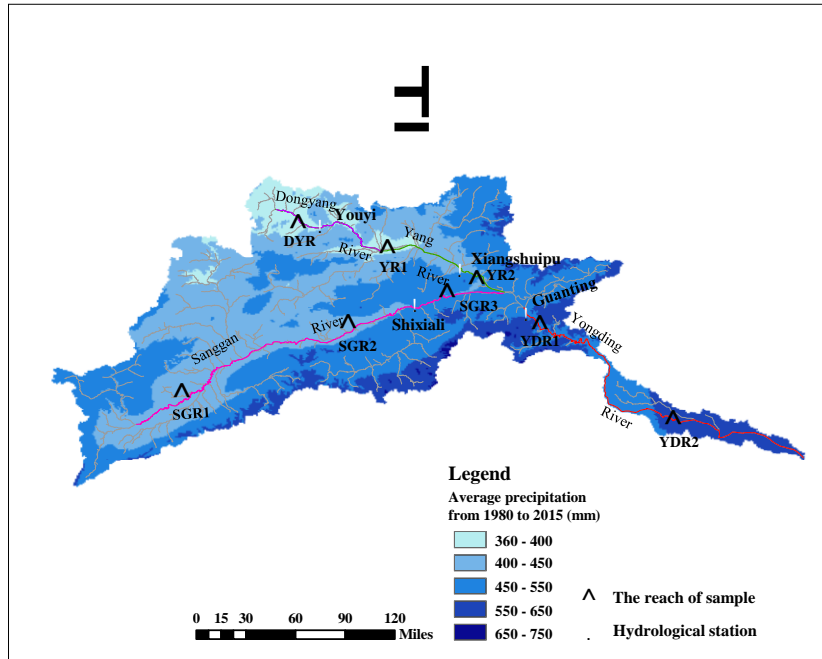

**Figure S1.** The distribution of the perennial average precipitation in the Yongding River Basin ([www.resdc.cn](http://www.resdc.cn)).

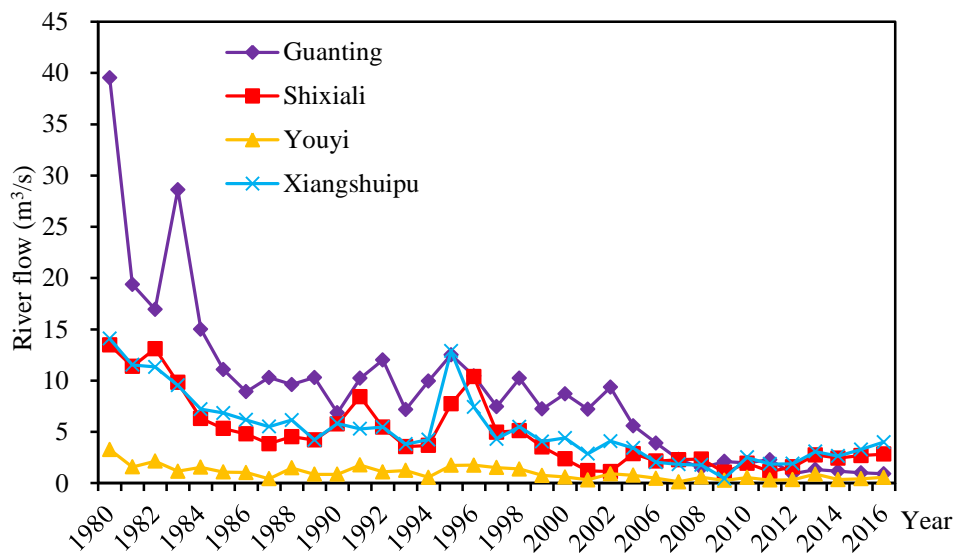

**Figure S2.** Long-term trends of river flow ( $m^3/s$ ) in the Yongding River Basin.

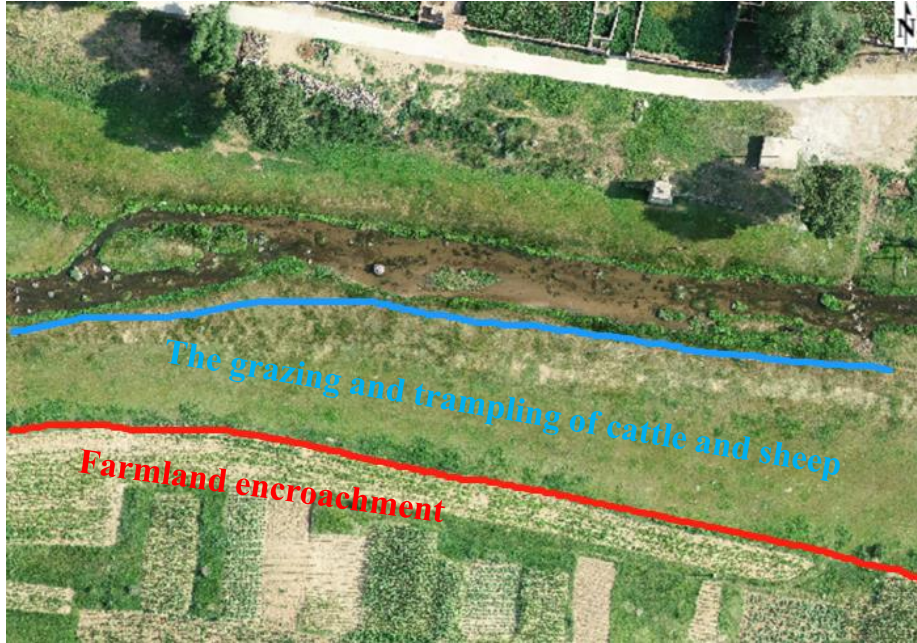

(a) DYR

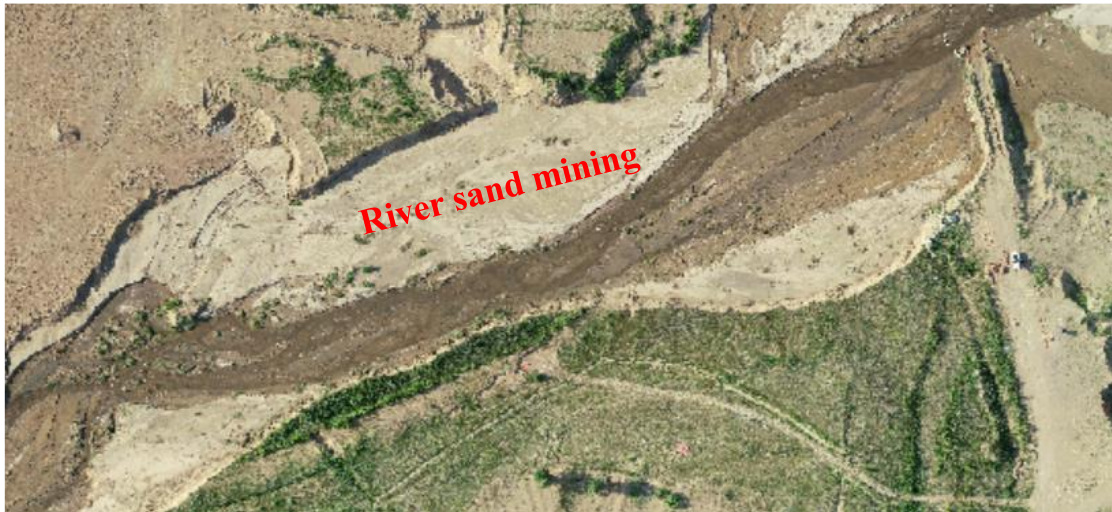

(b) YR1



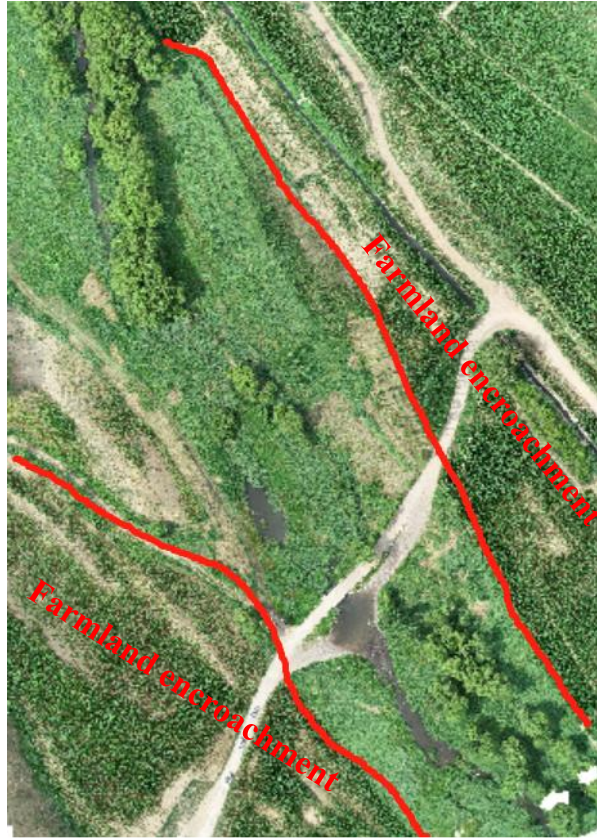

(c) YR2

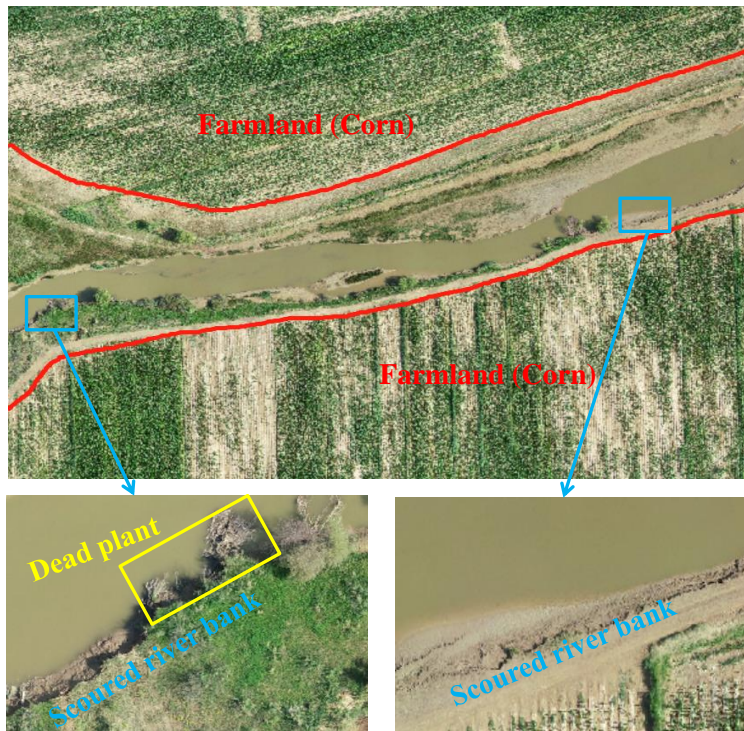

(d) SGR1

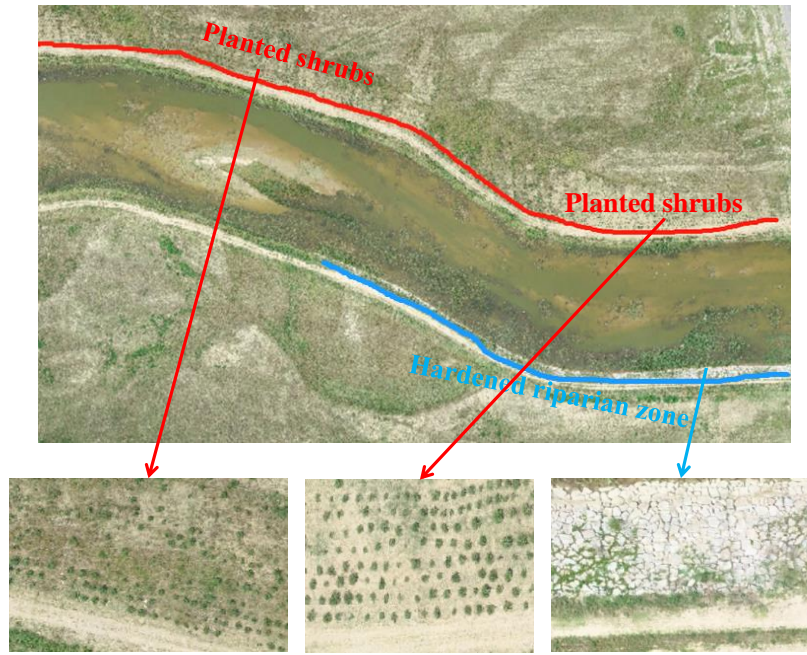

(e) SGH2

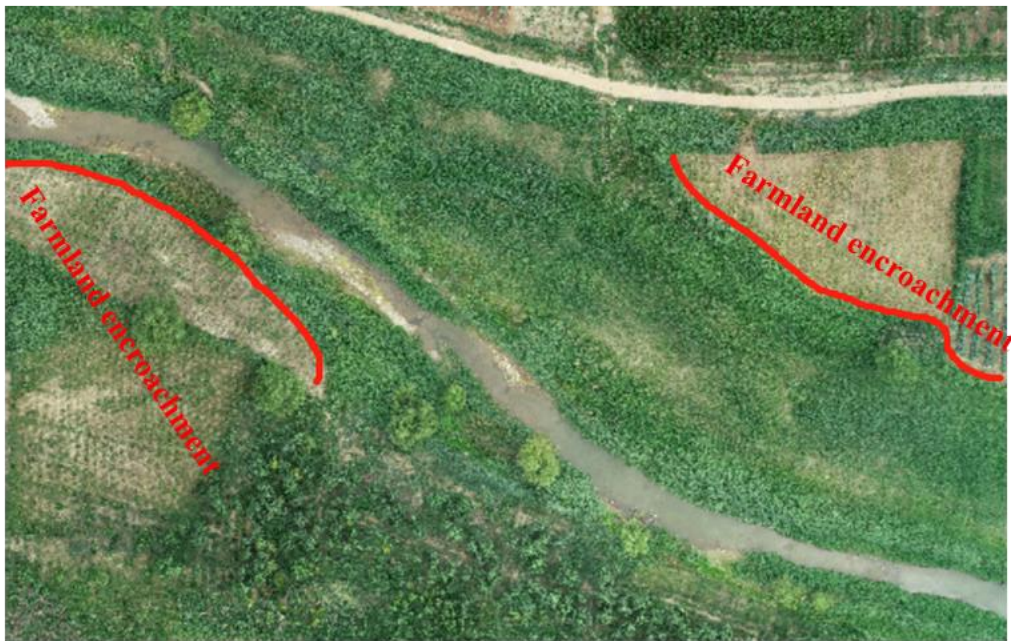

(f) SGH3



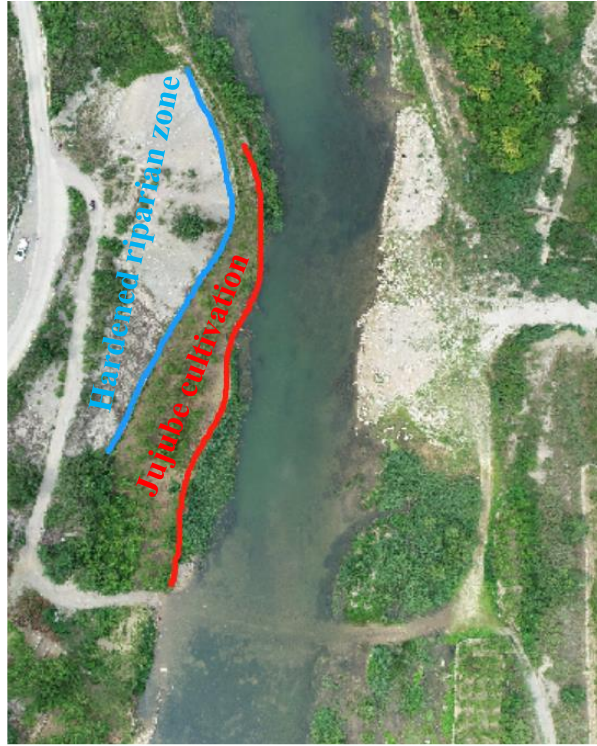

(g) YDR1

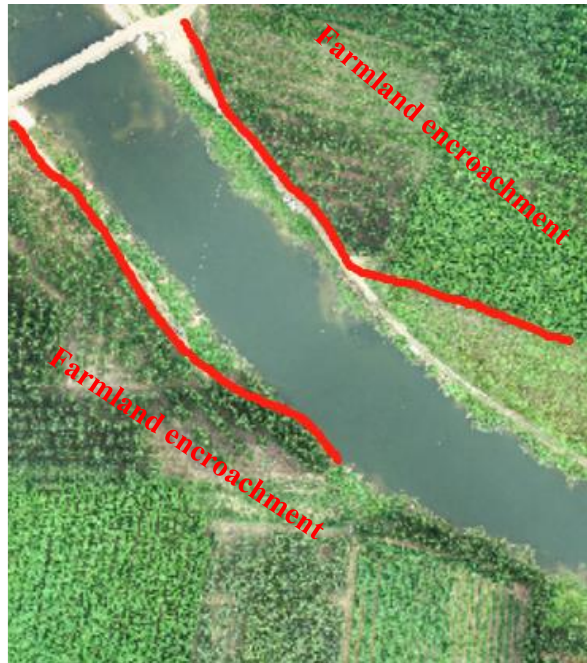

(h) YDR2

**Figure S3.** The disturbances associated with human activities in the riparian zone in the eight selected reaches in the Yongding River Basin.
